# Supplementary material
Source: publisher site journal article supplement (https://www.dovepress.com/get_supplementary_file.php?f=203709.docx)
Supplement: Supplementary file 1 [file get_supplementary_file.php]

# Supplementary materials


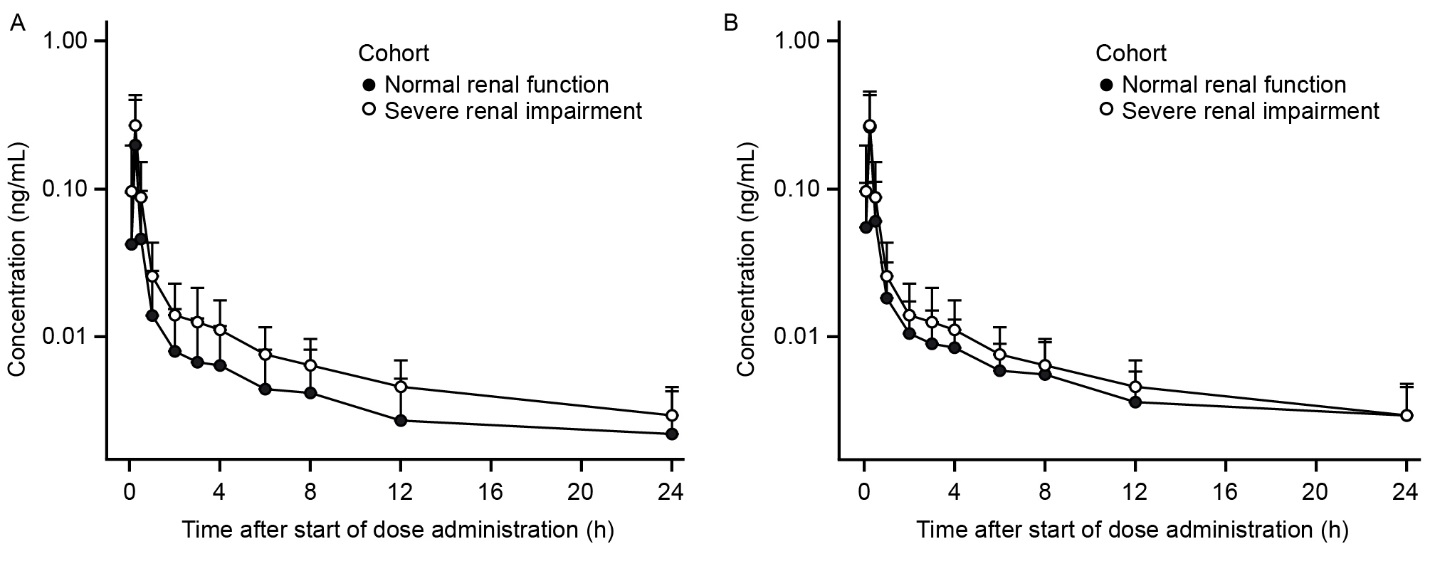


##### **Figure S1** Mean + SD plasma concentration-time profiles for revefenacin in all subjects (n=8 per group) (A) and after excluding two subjects in the normal function group who had very low concentration measurable to only 4 hours and 1 hour post dose, respectively, (B) in the renal impairment study.

**Abbreviations:** h, hours; SD, standard deviation.

**
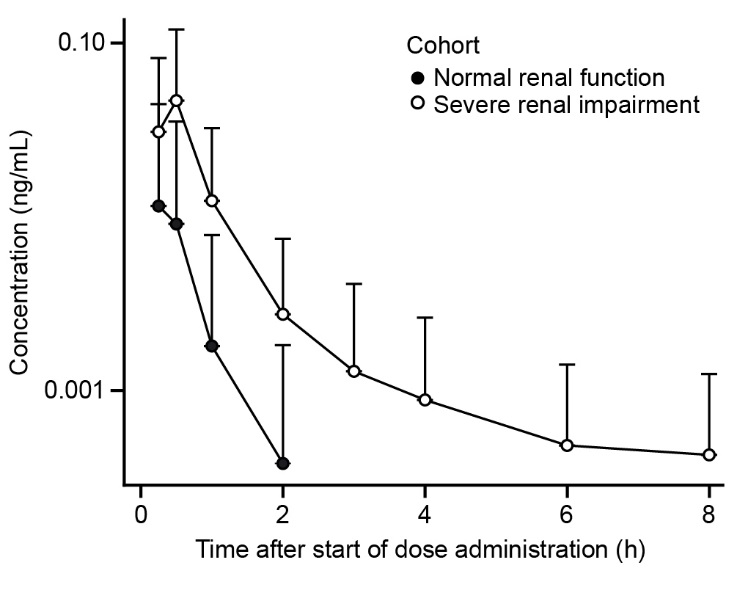
**

##### **Figure S2** Mean + SD plasma concentration-time profiles for THRX-195518 in subjects with and without severe renal impairment.

**Notes:** All mean concentrations were below the limit of quantitation after 2 hours in normal renal function group and 8 hours in severe renal impairment group postdose.

**Abbreviation:** SD, standard deviation.
